# Supplementary material for: Prevalence of and Risk Factors for Heterotopic Ossification After Cervical Total Disc Replacement: A Systematic Review and Meta-Analysis
Source: PubMed Central journal article supplement — Global Spine J. 2019 Oct 13;10(6):790–804. doi: 10.1177/2192568219881163 (PMC7383784; doi:10.1177/2192568219881163), 2019-10-13
Supplement: Summry_table_study_demographics.pdf [file Summry_table_study_demographics.pdf]

| Study                                 | HO prevalence (%) | Mean age | Male (%) | Single-level CTDR (%) | C5C6 (%) | C6C7 (%) | Mean operation time (minute) | Mean hospitalization (day) |
|---------------------------------------|-------------------|----------|----------|-----------------------|----------|----------|------------------------------|----------------------------|
| Coric et al., 2018 <sup>1</sup>       | 62.4              | 43.7     | 37.5     | 100                   | 61.0     | 27.2     | 80.2                         | 2.1                        |
| Gao et al., 2018 <sup>2</sup>         | 16.7              | 45.4     | 62.5     | 0                     | 50.0     | 15.4     | /                            | /                          |
| Pointillart et al., 2018 <sup>3</sup> | 54.5              | 46.2     | 55.6     | 77.8                  | 50.0     | 40.9     | /                            | /                          |
| Zhou et al., 2018 <sup>4</sup>        | 50.0              | 43.0     | 49.2     | 77.0                  | 67.1     | 12.9     | /                            | /                          |
| Zeng et al., 2018 <sup>5</sup>        | 46.7              | 43.8     | 42.2     | 100                   | 51.1     | 40.0     | /                            | /                          |
| Miao et al., 2018 <sup>6</sup>        | 65.6              | 41.3     | 48.1     | 70.9                  | 47.1     | 16.7     | /                            | /                          |
| Zarkadis et al., 2017 <sup>7</sup>    | 0                 | 40.0     | 83.3     | 0                     | 50.0     | 41.7     | /                            | /                          |
| Mehren et al., 2017 <sup>8</sup>      | 90.0              | 44.8     | 51.1     | 57.4                  | 40.0     | 41.4     | /                            | /                          |
| Wu_a et al., 2017 <sup>9</sup>        | 4.0               | 44.8     | 48.0     | 0                     | 36.0     | 12.0     | 106.4                        | /                          |
| Ozbek et al., 2017 <sup>10</sup>      | 21.8              | 43.6     | 40.0     | 77.0                  | 36.1     | 34.7     | /                            | /                          |
| Chang et al., 2017 <sup>11</sup>      | 87.5              | 45.6     | 42.0     | 100                   | 72.0     | 4.0      | /                            | /                          |
| Wu_b et al., 2017 <sup>12</sup>       | 7.4               | 48.1     | 59.3     | 0                     | /        | /        | 132.2                        | /                          |

|                                        |      |      |      |      |      |      |      |     |
|----------------------------------------|------|------|------|------|------|------|------|-----|
| Heo et al.,<br>2017 <sup>13</sup>      | 29.2 | 50.7 | 37.5 | 100  | 68.8 | 16.7 | /    | /   |
| Lanman et al.,<br>2017 <sup>14</sup>   | /    | 47.1 | 44.0 | 0    | /    | /    | /    | /   |
| Tian et al.,<br>2017 <sup>15</sup>     | 2.7  | 45.0 | 67.9 | 71.4 | 59.5 | 13.5 | /    | /   |
| Hisey et al.,<br>2016 <sup>16</sup>    | /    | 43.2 | 47.6 | 100  | /    | /    | 90.0 | 2.1 |
| Meisel et al.,<br>2016 <sup>17</sup>   | /    | 43.0 | 41.0 | 100  | 54.0 | 38.0 | 78.0 | /   |
| Sirikci et al.,<br>2016 <sup>18</sup>  | 4.6  | 39.5 | 52.5 | 64.4 | 48.8 | 26.7 | /    | /   |
| Kim et al.,<br>2016 <sup>19</sup>      | 69.6 | 45.0 | 87.0 | 100  | 65.2 | 8.7  | /    | /   |
| Sundseth et al.,<br>2016 <sup>20</sup> | 100  | 44.2 | 45.9 | 100  | 59.5 | 40.5 | /    | /   |
| Wagner et al.,<br>2016 <sup>21</sup>   | 13.8 | 41.7 | 76.1 | 62.8 | /    | /    | /    | /   |
| Lei et al.,<br>2016 <sup>22</sup>      | 51.4 | 42.6 | 48.4 | 87.1 | 32.3 | 35.5 | /    | /   |
| Gornet et al.,<br>2016 <sup>23</sup>   | 15.7 | 44.5 | 46.1 | 100  | 52.5 | 38.6 | 89.4 | 1.0 |
| Chang et al.,<br>2016 <sup>24</sup>    | 62.5 | 45.6 | 53.4 | 100  | 69.3 | 4.5  | /    | /   |
| Shichang et al.,<br>2016 <sup>25</sup> | 28.2 | 46.3 | 43.5 | 100  | 44.7 | 7.1  | 58.1 | 8.4 |
| Hou et al.,<br>2016 <sup>26</sup>      | 0    | 46.3 | 58.8 | 100  | 54.9 | 27.5 | 95.0 | 9.3 |

|                                         |      |      |      |      |      |      |       |     |
|-----------------------------------------|------|------|------|------|------|------|-------|-----|
| Zhao et al.,<br>2016 <sup>27</sup>      | 69.0 | 44.8 | 57.6 | 75.8 | 61.9 | 14.3 | /     | /   |
| Qizhi et al.,<br>2016 <sup>28</sup>     | 0    | 46.8 | 64.3 | 0    | 28.6 | 21.4 | 98.6  | /   |
| Thomas et al.,<br>2016 <sup>29</sup>    | 2.5  | 45.5 | 18.2 | 66.7 | /    | /    | /     | /   |
| Fransen et al.,<br>2016 <sup>30</sup>   | 53.2 | /    | /    | 60.6 | 43.1 | 38.2 | /     | /   |
| Shi et al.,<br>2016 <sup>31</sup>       | 13.3 | 46.5 | 40.0 | 100  | 41.7 | 16.7 | 79.2  | /   |
| Radcliff et al.,<br>2016 <sup>32</sup>  | 41.7 | 45.3 | 50.2 | 0    | /    | /    | /     | /   |
| Kim et al.,<br>2015 <sup>33</sup>       | 18.9 | 45.4 | 64.9 | 100  | 64.9 | 16.2 | /     | /   |
| Lee et al.,<br>2015 <sup>34</sup>       | 78.6 | 47.1 | 85.7 | 100  | 35.7 | 42.9 | /     | /   |
| Zhang et al.,<br>2015 <sup>35</sup>     | 34.0 | 42.7 | 50.9 | 100  | /    | /    | /     | /   |
| Skeppholm et<br>al., 2015 <sup>36</sup> | /    | 46.6 | 42.9 | 64.3 | 35.7 | 21.4 | /     | /   |
| Janssen et al.,<br>2015 <sup>37</sup>   | /    | 42.1 | 46.6 | 100  | /    | /    | /     | /   |
| Hur et al.,<br>2015 <sup>38</sup>       | 16.7 | /    | /    | 0    | /    | /    | /     | /   |
| Phillips et al.,<br>2015 <sup>39</sup>  | /    | 45.3 | 51.8 | 100  | 50.0 | 34.9 | 100.8 | 1.2 |
| Zhang a et al.,<br>2014 <sup>40</sup>   | 18.8 | /    | /    | 89.7 | 51.6 | 0    | 126.6 | /   |

|                                     |      |      |      |      |      |      |       |      |
|-------------------------------------|------|------|------|------|------|------|-------|------|
| Fay et al., 2014 <sup>41</sup>      | 41.9 | 50.6 | 60.8 | 62.4 | 54.1 | 12.2 | 213.2 | /    |
| Suchomel et al., 2014 <sup>42</sup> | /    | 42.9 | 40.0 | 100  | 53.7 | 37.1 | /     | /    |
| Zhang_b et al., 2014 <sup>43</sup>  | 32.7 | 44.8 | 45.5 | 100  | 29.1 | 21.8 | 84.5  | /    |
| Ding et al., 2014 <sup>44</sup>     | 7.7  | 50.6 | 61.5 | 0    | /    | /    | 153.1 | 10.3 |
| Qi et al., 2014 <sup>45</sup>       | 27.9 | 43.1 | 54.4 | 76.8 | 33.6 | 7.2  | /     | /    |
| Malham et al., 2014 <sup>46</sup>   | 36.4 | 40.3 | 54.2 | 79.2 | 48.3 | 41.4 | /     | /    |
| Zhao et al., 2013 <sup>47</sup>     | 65.4 | 44.0 | 61.5 | 100  | 61.5 | 11.5 | /     | /    |
| Li et al., 2013 <sup>48</sup>       | 18.2 | 46.4 | 49.1 | 100  | 61.8 | 10.9 | /     | /    |
| Zhang et al., 2013 <sup>49</sup>    | 26.1 | 46.5 | 65.0 | 85.0 | 52.2 | 0    | 134.5 | /    |
| Park et al., 2013 <sup>50</sup>     | 94.1 | 45.0 | 49.3 | 78.7 | 44.7 | 36.5 | /     | /    |
| Chen et al., 2013 <sup>51</sup>     | 16.1 | 45.0 | 58.1 | 100  | 90.3 | 0    | /     | /    |
| Pimenta et al., 2013 <sup>52</sup>  | 7.7  | 46.2 | 32.3 | 44.9 | 69.6 | 50.6 | /     | /    |
| Jin et al., 2013 <sup>53</sup>      | 64.2 | 46.0 | 72.8 | 74.7 | 50.5 | 24.2 | /     | /    |
| Cho et al., 2013 <sup>54</sup>      | /    | 41.7 | 78.1 | 84.4 | 64.7 | 17.6 | /     | /    |
| Choi et al., 2012 <sup>55</sup>     | 38.8 | 48.8 | 54.7 | 50.9 | 46.3 | 32.5 | /     | /    |
| Tu et al., 2012 <sup>56</sup>       | 56.1 | 46.7 | 68.0 | 57.3 | 56.1 | 11.2 | /     | /    |

|                                    |      |      |      |      |      |      |       |     |
|------------------------------------|------|------|------|------|------|------|-------|-----|
| Sun et al., 2012 <sup>57</sup>     | 42.3 | 44.0 | 53.8 | 100  | 76.9 | 3.8  | /     | /   |
| Chung et al., 2012 <sup>58</sup>   | 68.4 | 50.1 | 63.2 | 100  | 47.4 | 47.4 | /     | /   |
| GUeRIN et al., 2012 <sup>59</sup>  | 27.7 | 41.2 | 45.1 | 77.5 | /    | /    | 75.0  | /   |
| Wu et al., 2012 <sup>60</sup>      | 37.5 | 45.5 | 60.0 | 100  | 67.5 | 5.0  | /     | /   |
| Lee et al., 2012 <sup>61</sup>     | 64.3 | 44.4 | 75.0 | 67.9 | 50.0 | 10.7 | /     | /   |
| Zhang et al., 2012 <sup>62</sup>   | 12.5 | 44.8 | 58.3 | 100  | 43.3 | 13.3 | 92.4  | 3.3 |
| Barrey et al., 2012 <sup>63</sup>  | 18.8 | 42.3 | 43.8 | 100  | 75.0 | 21.9 | 65.6  | 5.1 |
| Cho et al., 2012 <sup>64</sup>     | 46.5 | 46.3 | 55.0 | 86.0 | 51.2 | 25.6 | /     | /   |
| US FDA IDE trial (P100003) 2012    | 74.2 | 42.7 | 53.3 | 100  | 51.3 | 39.2 | 91.7  | 1.1 |
| Wang et al., 2011 <sup>65</sup>    | 0    | 46.5 | 65.0 | 85.0 | 52.2 | 0    | 134.5 | /   |
| Peng et al., 2011 <sup>66</sup>    | /    | 43.9 | 47.5 | 62.5 | 55.9 | 15.3 | /     | /   |
| Huppert et al., 2011 <sup>67</sup> | 62.0 | 44.9 | 39.8 | 75.8 | 44.7 | 39.9 | 97.9  | 3.5 |
| Ren et al., 2011 <sup>68</sup>     | /    | 46.0 | 57.8 | 86.7 | 53.3 | 11.1 | /     | /   |
| Tu et al., 2011 <sup>69</sup>      | 48.1 | 46.6 | 58.3 | 55.6 | 61.5 | 9.6  | /     | /   |

|                                          |      |      |      |      |      |      |       |     |
|------------------------------------------|------|------|------|------|------|------|-------|-----|
| Du et al., 2011 <sup>70</sup>            | 0    | 47.9 | 56.0 | 96.0 | /    | /    | 132.6 | /   |
| Cardoso et al., 2011 <sup>71</sup>       | 0    | 50.0 | 58.1 | 0    | 60.0 | 6.7  | /     | /   |
| Kowalczyk et al., 2011 <sup>72</sup>     | 3.3  | 44.4 | 50.0 | 100  | 55.0 | 33.3 | /     | /   |
| Zhao et al., 2010 <sup>73</sup>          | 33.3 | 43.8 | 50.0 | 90.9 | 75.0 | 4.2  | /     | /   |
| Walraevens et al., 2010 <sup>74</sup>    | 38.5 | 42.8 | 42.7 | 100  | /    | /    | /     | /   |
| Lee et al., 2010 <sup>75</sup>           | 27.1 | 44.0 | 56.3 | 100  | 56.3 | 29.2 | /     | /   |
| Reyes-Sanchez et al., 2010 <sup>76</sup> | 0    | 44.5 | 8.0  | 48.0 | 47.4 | 23.7 | /     | /   |
| Suchomel et al., 2010 <sup>77</sup>      | 88.3 | 45.3 | 50.0 | 81.5 | 58.5 | 29.2 | 82.0  | 3.7 |
| Ryu et al., 2010 <sup>78</sup>           | 52.8 | 46.6 | 58.3 | 100  | 47.2 | 30.6 | /     | /   |
| Cardoso et al., 2010 <sup>79</sup>       | 0    | 45.0 | 100  | 0    | 36.4 | 31.8 | /     | /   |
| Barbagallo et al., 2010 <sup>80</sup>    | 42.2 | 40.9 | 60.0 | 63.3 | 51.1 | 28.9 | /     | /   |
| Cheng et al., 2009 <sup>81</sup>         | 0    | 45.0 | 51.6 | 0    | /    | /    | /     | /   |
| Yang et al., 2009 <sup>82</sup>          | 0    | 45.4 | 66.7 | 100  | 37.5 | 12.5 | 140.0 | /   |
| Bhadra et al., 2009 <sup>83</sup>        | 13.3 | 34.0 | 60.0 | 100  | 60.0 | 33.3 | 105.0 | 2.0 |

|                                     |      |      |      |      |      |      |       |     |
|-------------------------------------|------|------|------|------|------|------|-------|-----|
| US FDA IDE trial (P060023) 2009     | /    | 44.4 | 45.5 | 100  | 57.9 | 36.0 | 132.0 | 1.1 |
| Heidecke et al., 2008 <sup>84</sup> | 28.8 | 46.7 | 40.7 | 90.7 | 55.9 | 13.6 | /     | /   |
| Kim et al., 2008 <sup>85</sup>      | 0    | /    | 63.8 | 83.0 | 47.3 | 36.4 | /     | /   |
| Park et al., 2008 <sup>86</sup>     | 0    | 45.0 | 52.4 | 100  | 61.9 | 28.6 | 167.0 | 5.6 |
| Amit et al., 2007 <sup>87</sup>     | 0    | 51.0 | 59.1 | 100  | /    | /    | 120.0 | /   |
| Pimenta et al., 2007 <sup>88</sup>  | 0.4  | 46.0 | 40.0 | 50.7 | 44.2 | 28.6 | 113.5 | 1.1 |
| Mehren et al., 2006 <sup>89</sup>   | 66.2 | /    | /    | 63.0 | 46.8 | 37.7 | /     | /   |
| Pickett et al., 2006 <sup>90</sup>  | 2.7  | /    | 16.2 | /    | 43.8 | 32.3 | /     | /   |
| Leung et al., 2006 <sup>91</sup>    | 17.8 | 45.0 | 43.3 | /    | /    | /    | /     | /   |
| Pimenta et al., 2004 <sup>92</sup>  | /    | 45.0 | 39.6 | 52.8 | 33.7 | 21.8 | /     | /   |

HO, heterotopic ossification; CTDR, cervical total disc replacement.

## Reference

1. Coric D, Guyer RD, Nunley PD, et al. Prospective, randomized multicenter study of cervical arthroplasty versus anterior cervical discectomy and fusion: 5-year results with a metal-on-metal artificial disc. *Journal of Neurosurgery: Spine*. 2018;1-10.
2. Gao X, Yang Y, Liu H, et al. Cervical disc arthroplasty with Prestige-LP for the treatment of contiguous 2-level cervical degenerative disc disease: 5-year follow-up results. *Medicine*. 2018;97(4).
3. Pointillart V, Castelain J-E, Coudert P, Cawley DT, Gille O, Vital J-M. Outcomes of the Bryan cervical disc replacement: fifteen year follow-up. *International orthopaedics*. 2018;42(4):851-857.
4. Zhou F, Ju KL, Zhao Y, et al. Progressive Bone Formation After Cervical Disc Replacement. *Spine*. 2018;43(3):E163-E170.
5. Zeng J, Liu H, Wang B, et al. Clinical and radiographic comparison of cervical disc arthroplasty with Prestige-LP Disc and anterior cervical fusion: A minimum 6-year follow-up study. *Clinical neurology and neurosurgery*. 2018;164:97-102.
6. Miao J, Shen Y, Li C, et al. Cervical Artificial Disc Replacement With Discover Prosthesis Does Not Reduce the Midterm Risk of Heterotopic Ossification: Results of a Cohort Study. *Clinical spine surgery*. 2018;31(3):E204-E208.
7. Zarkadis NJ, Cleveland AW, Kusnezov NA, Dunn JC, Caram PM, Herzog JP. Outcomes Following Multilevel Cervical Disc Arthroplasty in the Young Active Population. *Military medicine*. 2017;182(3-4):e1790-e1794.
8. Mehren C, Heider F, Siepe CJ, et al. Clinical and radiological outcome at 10 years of follow-up after total cervical disc replacement. *European Spine Journal*. 2017;26(9):2441-2449.
9. Wu T, Wang B, Ding C, et al. Artificial cervical disc replacement with the Prestige-LP prosthesis for the treatment of non-contiguous 2-level cervical degenerative disc disease: a minimum 24-month follow-up. *Clinical neurology and neurosurgery*. 2017;152:57-62.
10. Ozbek Z, Ozkara E, Arslantaş A. Implant Migration in Cervical Disk Arthroplasty. *World neurosurgery*. 2017;97:390-397.
11. Chang H-K, Chang C-C, Tu T-H, et al. Can segmental mobility be increased by cervical arthroplasty? *Neurosurgical focus*. 2017;42(2):E3.
12. Wu T-k, Wang B-y, Cheng D, et al. Clinical and radiographic features of hybrid surgery for the treatment of skip-level cervical degenerative disc disease: A minimum 24-month follow-up. *Journal of Clinical Neuroscience*. 2017;40:102-108.
13. Heo DH, Lee DC, Oh JY, Park CK. Bone loss of vertebral bodies at the operative segment after cervical arthroplasty: a potential complication? *Neurosurgical focus*. 2017;42(2):E7.
14. Lanman TH, Burkus JK, Dryer RG, Gornet MF, McConnell J, Hodges SD. Long-term clinical and radiographic outcomes of the Prestige LP artificial cervical disc replacement at 2 levels: results from a prospective randomized controlled clinical trial. *Journal of Neurosurgery: Spine*. 2017;27(1):7-19.



15. Tian W, Yan K, Han X, Yu J, Jin P, Han X. Comparison of the Clinical and Radiographic Results Between Cervical Artificial Disk Replacement and Anterior Cervical Fusion: A 6-Year Prospective Nonrandomized Comparative Study. *Clinical spine surgery*. 2017;30(5):E578-E586.
16. Hisey MS, Zigler JE, Jackson R, et al. Prospective, randomized comparison of one-level Mobi-C cervical total disc replacement vs. anterior cervical discectomy and fusion: results at 5-year follow-up. *International journal of spine surgery*. 2016;10.
17. Meisel H-J, Jurák L, Antinheimo J, et al. Four-year results of a prospective single-arm study on 200 semi-constrained total cervical disc prostheses: clinical and radiographic outcome. *Journal of Neurosurgery: Spine*. 2016;25(5):556-565.
18. Sirikci M, Karaca S, Enercan M, et al. Radiologic and Clinical Outcome of the Operated and Adjacent Segments Following Prodisc-C Cervical Arthroplasty After a Minimum 24-month Follow-up: A Single Surgeon-center Experience. *Neurosurgery Quarterly*. 2016;26(3):234-239.
19. Kim KS, Heo DH. Do postoperative biomechanical changes induce heterotopic ossification after cervical arthroplasty?: A 5-year follow-up study. *Clinical spine surgery*. 2016;29(6):E309-E313.
20. Sundseth J, Jacobsen EA, Kolstad F, et al. Heterotopic ossification and clinical outcome in nonconstrained cervical arthroplasty 2 years after surgery: the Norwegian Cervical Arthroplasty Trial (NORCAT). *European Spine Journal*. 2016;25(7):2271-2278.
21. Wagner SC, Formby PM, Kang DG, et al. Persistent axial neck pain after cervical disc arthroplasty: a radiographic analysis. *The Spine Journal*. 2016;16(7):851-856.
22. Lei T, Liu Y, Wang H, et al. Clinical and radiological analysis of Bryan cervical disc arthroplasty: eight-year follow-up results compared with anterior cervical discectomy and fusion. *International orthopaedics*. 2016;40(6):1197-1203.
23. Gornet MF, Burkus JK, Shaffrey ME, Nian H, Harrell Jr FE. Cervical disc arthroplasty with prestige LP disc versus anterior cervical discectomy and fusion: seven-year outcomes. *International journal of spine surgery*. 2016;10.
24. Chang P-Y, Chang H-K, Wu J-C, et al. Differences between C3–4 and other subaxial levels of cervical disc arthroplasty: more heterotopic ossification at the 5-year follow-up. *Journal of Neurosurgery: Spine*. 2016;24(5):752-759.
25. Shichang L, Yueming S, Limin L, et al. Clinical and radiologic comparison of dynamic cervical implant arthroplasty and cervical total disc replacement for single-level cervical degenerative disc disease. *Journal of Clinical Neuroscience*. 2016;27:102-109.
26. Hou Y, Nie L, Pan X, et al. Effectiveness and safety of Mobi-C for treatment of single-level cervical disc spondylosis: a randomised control trial with a minimum of five years of follow-up. *Bone Joint J*. 2016;98(6):829-833.
27. Zhao Y, Zhang Y, Sun Y, Pan S, Zhou F, Liu Z. Application of cervical arthroplasty with Bryan cervical disc: 10-year follow-up results in China. *Spine*. 2016;41(2):111-115.
28. Qizhi S, Lei S, Peijia L, et al. A comparison of zero-profile devices and artificial cervical disks in patients with 2 noncontiguous levels of cervical spondylosis. *Clinical spine surgery*. 2016;29(2):E61-E66.

29. Thomas S, Willems K, Van den Daelen L, Linden P, Ciocci M-C, Bocher P. The M6-C cervical disk prosthesis: first clinical experience in 33 patients. *Clinical spine surgery*. 2016;29(4):E182-E187.
30. Fransen P, Hansen-Algenstaedt N, Chatzistiriou A, et al. Radiographic outcome and adjacent segment evaluation two years after cervical disc replacement with the Baguera® C prosthesis as treatment of degenerative cervical disc disease. *J Spine*. 2016;5(2):1-7.
31. Shi S, Zheng S, Li X-F, Yang L-L, Liu Z-D, Yuan W. Comparison of 2 Zero-Profile implants in the treatment of single-level cervical spondylotic myelopathy: a preliminary clinical study of cervical disc arthroplasty versus fusion. *PloS one*. 2016;11(7):e0159761.
32. Radcliff K, Coric D, Albert T. Five-year clinical results of cervical total disc replacement compared with anterior discectomy and fusion for treatment of 2-level symptomatic degenerative disc disease: a prospective, randomized, controlled, multicenter investigational device exemption clinical trial. *Journal of Neurosurgery: Spine*. 2016;25(2):213-224.
33. Kim SH, Chung YS, Ropper AE, et al. Bone loss of the superior adjacent vertebral body immediately posterior to the anterior flange of Bryan cervical disc. *European Spine Journal*. 2015;24(12):2872-2879.
34. Lee SE, Jahng T-A, Kim HJ. Correlation between cervical lordosis and adjacent segment pathology after anterior cervical spinal surgery. *European Spine Journal*. 2015;24(12):2899-2909.
35. Zhang Z, Jiao L, Zhu W, Du Y, Zhang W. Comparison of Bryan versus ProDisc-C total disc replacement as treatment for single-level cervical symptomatic degenerative disk disease. *Archives of orthopaedic and trauma surgery*. 2015;135(3):305-311.
36. Skeppholm M, Svedmark P, Noz ME, Maguire Jr GQ, Olivecrona H, Olerud C. Evaluation of mobility and stability in the Discover artificial disc: an in vivo motion study using high-accuracy 3D CT data. *Journal of Neurosurgery: Spine*. 2015;23(3):383-389.
37. Janssen ME, Zigler JE, Spivak JM, Delamarter RB, Darden BV, Kopjar B. ProDisc-C total disc replacement versus anterior cervical discectomy and fusion for single-level symptomatic cervical disc disease: seven-year follow-up of the prospective randomized US Food and Drug Administration Investigational Device Exemption Study. *JBJS*. 2015;97(21):1738-1747.
38. Hur J-W, Ryu K-S, Kim J-S, Seong J-h. Multilevel Fusion versus Hybrid Surgery in Three-Level Cervical Disc Disease: Retrospective Matched Analysis of Clinical and Radiologic Results in Minimum Two-Year Follow-Up. *The Spine Journal*. 2015;15(10):S236-S237.
39. Phillips FM, Geisler FH, Gilder KM, Reah C, Howell KM, McAfee PC. Long-term outcomes of the US FDA IDE prospective, randomized controlled clinical trial comparing PCM cervical disc arthroplasty with anterior cervical discectomy and fusion. *Spine*. 2015;40(10):674-683.
40. Zhang Z, Zhu W, Zhu L, Du Y. Midterm outcomes of total cervical total disc replacement with Bryan prosthesis. *European Journal of Orthopaedic Surgery & Traumatology*. 2014;24(1):275-281.
41. Fay L-Y, Huang W-C, Wu J-C, et al. Arthroplasty for cervical spondylotic myelopathy: similar results to patients with only radiculopathy at 3 years' follow-up. *Journal of Neurosurgery: Spine*. 2014;21(3):400-410.

42. Suchomel P, Jurák L, Antinheimo J, et al. Does sagittal position of the CTDR-related centre of rotation influence functional outcome? Prospective 2-year follow-up analysis. *European Spine Journal*. 2014;23(5):1124-1134.
43. Zhang H-X, Shao Y-D, Chen Y, et al. A prospective, randomised, controlled multicentre study comparing cervical disc replacement with anterior cervical decompression and fusion. *International orthopaedics*. 2014;38(12):2533-2541.
44. Ding F, Jia Z, Wu Y, Li C, He Q, Ruan D. Fusion-nonfusion hybrid construct versus anterior cervical hybrid decompression and fusion: a comparative study for 3-level cervical degenerative disc diseases. *Spine*. 2014;39(23):1934-1942.
45. Qi M, Chen H, Cao P, Tian Y, Yuan W. Incidence and risk factors analysis of heterotopic ossification after cervical disc replacement. *Chinese medical journal*. 2014;127(22):3871-3875.
46. Malham GM, Parker RM, Ellis NJ, Chan PG, Varma D. Cervical artificial disc replacement with ProDisc-C: clinical and radiographic outcomes with long-term follow-up. *Journal of Clinical Neuroscience*. 2014;21(6):949-953.
47. Zhao Y, Sun Y, Zhou F, Liu Z. Cervical disc arthroplasty with ProDisc-C artificial disc: 5-year radiographic follow-up results. *Chin Med J (Engl)*. 2013;126(20):3809-3811.
48. Li J, Liang L, Ye X-f, Qi M, Chen H-j, Yuan W. Cervical arthroplasty with Discover prosthesis: clinical outcomes and analysis of factors that may influence postoperative range of motion. *European Spine Journal*. 2013;22(10):2303-2309.
49. Zhang Z, Gu B, Zhu W, Wang Q, Zhang W. Clinical and radiographic results of Bryan cervical total disc replacement: 4-year outcomes in a prospective study. *Archives of orthopaedic and trauma surgery*. 2013;133(8):1061-1066.
50. Park JH, Rhim SC, Roh SW. Mid-term follow-up of clinical and radiologic outcomes in cervical total disk replacement (Mobi-C): incidence of heterotopic ossification and risk factors. *Clinical Spine Surgery*. 2013;26(3):141-145.
51. Chen F, Yang J, Ni B, Guo Q, Lu X, Xie N. Clinical and radiological follow-up of single-level Prestige LP cervical disc replacement. *Archives of orthopaedic and trauma surgery*. 2013;133(4):473-480.
52. Pimenta L, Oliveira L, Coutinho E, Marchi L. Bone formation in cervical total disk replacement (CTDR) up to the 6-year follow-up: Experience from 272 levels. *Neurosurgery Quarterly*. 2013;23(1):1-6.
53. Jin YJ, Park SB, Kim MJ, Kim K-J, Kim H-J. An analysis of heterotopic ossification in cervical disc arthroplasty: a novel morphologic classification of an ossified mass. *The Spine Journal*. 2013;13(4):408-420.
54. Cho Y-H, Kim K-S, Kwon Y-M. Heterotopic ossification after cervical arthroplasty with ProDisc-C: time course radiographic follow-up over 3 years. *Korean Journal of Spine*. 2013;10(1):19.
55. Choi D, Petrik V, Fox S, Parkinson J, Timothy J, Gullan R. Motion preservation and clinical outcome of porous coated motion cervical disk arthroplasty. *Neurosurgery*. 2012;71(1):30-37.

56. Tu T-H, Wu J-C, Huang W-C, Wu C-L, Ko C-C, Cheng H. The effects of carpentry on heterotopic ossification and mobility in cervical arthroplasty: determination by computed tomography with a minimum 2-year follow-up. *Journal of Neurosurgery: Spine*. 2012;16(6):601-609.
57. Sun Y, Zhao Y, Pan S, Zhou F, Chen Z, Liu Z. Comparison of adjacent segment degeneration five years after single level cervical fusion and cervical arthroplasty: a retrospective controlled study. *Chinese medical journal*. 2012;125(22):3939-3941.
58. Chung S-B, Muradov JM, Lee S-H, Eoh W, Kim E-S. Uncovertebral hypertrophy is a significant risk factor for the occurrence of heterotopic ossification after cervical disc replacement: survivorship analysis of Bryan disc for single-level cervical arthroplasty. *Acta neurochirurgica*. 2012;154(6):1017-1022.
59. GUÉRIN P, Obeid I, Bourghli A, et al. Heterotopic ossification after cervical disc replacement: clinical significance and radiographic analysis. A prospective study. *Acta Orthopædica Belgica*. 2012;78(1):80.
60. Wu J-C, Huang W-C, Tu T-H, et al. Differences between soft-disc herniation and spondylosis in cervical arthroplasty: CT-documented heterotopic ossification with minimum 2 years of follow-up. *Journal of Neurosurgery: Spine*. 2012;16(2):163-171.
61. Lee SE, Chung CK, Jahng TA. Early development and progression of heterotopic ossification in cervical total disc replacement. *Journal of Neurosurgery: Spine*. 2012;16(1):31-36.
62. Zhang X, Zhang X, Chen C, et al. Randomized, controlled, multicenter, clinical trial comparing BRYAN cervical disc arthroplasty with anterior cervical decompression and fusion in China. *Spine*. 2012;37(6):433-438.
63. Barrey C, Champain S, Campana S, Ramadan A, Perrin G, Skalli W. Sagittal alignment and kinematics at instrumented and adjacent levels after total disc replacement in the cervical spine. *European Spine Journal*. 2012;21(8):1648-1659.
64. Cho H-J, Shin M-H, Huh J-W, Ryu K-S, Park C-K. Heterotopic ossification following cervical total disc replacement: iatrogenic or constitutional? *Korean Journal of Spine*. 2012;9(3):209.
65. Wang Q, Cheng H, Mao Z, Qi X, Zhang M, Chen Y. Clinical and radiographic results after treatment of cervical degenerative disc disease with the bryan disc prosthesis: a prospective study with 2-year follow-up. *Acta Orthopædica Belgica*. 2011;77(6):809.
66. Peng CWB, Yue WM, Basit A, et al. Intermediate results of the prestige LP cervical disc replacement: clinical and radiological analysis with minimum two-year follow-up. *Spine*. 2011;36(2):E105-E111.
67. Huppert J, Beaurain J, Steib J, et al. Comparison between single-and multi-level patients: clinical and radiological outcomes 2 years after cervical disc replacement. *European Spine Journal*. 2011;20(9):1417-1426.
68. Ren X, Wang W, Chu T, Wang J, Li C, Jiang T. The intermediate clinical outcome and its limitations of Bryan cervical arthroplasty for treatment of cervical disc herniation. *Clinical Spine Surgery*. 2011;24(4):221-229.
69. Tu T-H, Wu J-C, Huang W-C, et al. Heterotopic ossification after cervical total disc replacement: determination by CT and effects on clinical outcomes. *Journal of Neurosurgery: Spine*. 2011;14(4):457-465.

70. Du J, Li M, Liu H, Meng H, He Q, Luo Z. Early follow-up outcomes after treatment of degenerative disc disease with the discover cervical disc prosthesis. *The Spine Journal*. 2011;11(4):281-289.
71. Cardoso MJ, Mendelsohn A, Rosner MK. Cervical hybrid arthroplasty with 2 unique fusion techniques. *Journal of Neurosurgery: Spine*. 2011;15(1):48-54.
72. Kowalczyk I, Lazaro BC, Fink M, Rabin D, Duggal N. Analysis of in vivo kinematics of 3 different cervical devices: Bryan disc, ProDisc-C, and Prestige LP disc. *Journal of Neurosurgery: Spine*. 2011;15(6):630-635.
73. Zhao Y-b, Sun Y, Chen Z-q, Liu Z-j. Application of cervical arthroplasty with Bryan cervical disc: long-term X-ray and magnetic resonance imaging follow-up results. *Chinese Medical Journal (English Edition)*. 2010;123(21):2999.
74. Walraevens J, Demaerel P, Suetens P, et al. Longitudinal prospective long-term radiographic follow-up after treatment of single-level cervical disk disease with the Bryan Cervical Disc. *Neurosurgery*. 2010;67(3):679-687.
75. Lee J-H, Jung T-G, Kim H-S, Jang J-S, Lee S-H. Analysis of the incidence and clinical effect of the heterotopic ossification in a single-level cervical artificial disc replacement. *The Spine Journal*. 2010;10(8):676-682.
76. Reyes-Sanchez A, Miramontes V, Olivarez LMR, Aquirre AA, Quiroz AO, Zarate-Kalfopulos B. Initial clinical experience with a next-generation artificial disc for the treatment of symptomatic degenerative cervical radiculopathy. *SAS journal*. 2010;4(1):9-15.
77. Suchomel P, Jurák L, Beneš V, Brabec R, Bradáč O, Elgawhary S. Clinical results and development of heterotopic ossification in total cervical disc replacement during a 4-year follow-up. *European Spine Journal*. 2010;19(2):307-315.
78. Ryu K-S, Park C-K, Jun S-C, Huh H-Y. Radiological changes of the operated and adjacent segments following cervical arthroplasty after a minimum 24-month follow-up: comparison between the Bryan and Prodisc-C devices. *Journal of Neurosurgery: Spine*. 2010;13(3):299-307.
79. Cardoso MJ, Rosner MK. Multilevel cervical arthroplasty with artificial disc replacement. *Neurosurgical focus*. 2010;28(5):E19.
80. Barbagallo GM, Corbino LA, Olindo G, Albanese V. Heterotopic ossification in cervical disc arthroplasty: is it clinically relevant? *Evidence-based spine-care journal*. 2010;1(1):15.
81. Cheng L, Nie L, Zhang L, Hou Y. Fusion versus Bryan Cervical Disc in two-level cervical disc disease: a prospective, randomised study. *International orthopaedics*. 2009;33(5):1347.
82. Yang YC, Nie L, Cheng L, Hou Y. Clinical and radiographic reports following cervical arthroplasty: a 24-month follow-up. *International orthopaedics*. 2009;33(4):1037-1042.
83. Bhadra AK, Raman A, Casey AT, Crawford R. Single-level cervical radiculopathy: clinical outcome and cost-effectiveness of four techniques of anterior cervical discectomy and fusion and disc arthroplasty. *European Spine Journal*. 2009;18(2):232-237.
84. Heidecke V, Burkert W, Brucke M, Rainov N. Intervertebral disc replacement for cervical degenerative disease—clinical results and functional outcome at two years in patients implanted with the Bryan® cervical disc prosthesis. *Acta neurochirurgica*. 2008;150(5):453.

85. Kim SW, Shin JH, Arbatin JJ, Park MS, Chung YK, McAfee PC. Effects of a cervical disc prosthesis on maintaining sagittal alignment of the functional spinal unit and overall sagittal balance of the cervical spine. *European Spine Journal*. 2008;17(1):20-29.
86. Park JH, Roh KH, Cho JY, Ra YS, Rhim SC, Noh SW. Comparative analysis of cervical arthroplasty using Mobi-C® and anterior cervical discectomy and fusion using the solis®-cage. *Journal of Korean Neurosurgical Society*. 2008;44(4):217.
87. Amit A, Dorward N. Bryan cervical disc prosthesis: 12-month clinical outcome. *British journal of neurosurgery*. 2007;21(5):478-484.
88. Pimenta L, McAfee PC, Cappuccino A, Cunningham BW, Diaz R, Coutinho E. Superiority of multilevel cervical arthroplasty outcomes versus single-level outcomes: 229 consecutive PCM prostheses. *Spine*. 2007;32(12):1337-1344.
89. Mehren C, Suchomel P, Grochulla F, et al. Heterotopic ossification in total cervical artificial disc replacement. *Spine*. 2006;31(24):2802-2806.
90. Pickett GE, Sekhon LH, Sears WR, Duggal N. Complications with cervical arthroplasty. *Journal of Neurosurgery: Spine*. 2006;4(2):98-105.
91. Leung C, Casey AT, Goffin J, et al. Clinical significance of heterotopic ossification in cervical disc replacement: a prospective multicenter clinical trial. *Neurosurgery*. 2005;57(4):759-763.
92. Pimenta L, McAfee PC, Cappuccino A, Bellera FP, Link HD. Clinical experience with the new artificial cervical PCM (Cervitech) disc. *The Spine Journal*. 2004;4(6):S315-S321.
